# Supplementary material
Source: Springer Nature journal article supplement (https://www.springermedizin.de/resource/supplementary/12913_2006_242_MOESM1_ESM.pdf/9534668)
Supplement: MOESM1 [file 9534668]

Screened patients  
1.1.99-31.03.01:  
n = 999

```
graph TD; A["Screened patients  
1.1.99-31.03.01:  
n = 999"] --> B["Included in analysis:  
n = 717"]; A --> C["Not included: n = 282<br/>• Patients' questionnaire missing: n = 57<br/>• Physician's questionnaire missing: n = 26<br/>• Patients' and physician's questionnaire dated > 30 days apart: n = 58<br/>• No informed consent: n = 9<br/>• Less than three follow-up questionnaires available: n = 94<br/>• Other reasons: n = 38"];
```

Included in analysis:  
n = 717

Not included: n = 282

- Patients' questionnaire missing: n = 57
- Physician's questionnaire missing: n = 26
- Patients' and physician's questionnaire dated > 30 days apart: n = 58
- No informed consent: n = 9
- Less than three follow-up questionnaires available: n = 94
- Other reasons: n = 38
